# Supplementary material
Source: PubMed Central journal article supplement (PMC3170089)
Supplement: NIHMS311883-supplement-01.pdf [file NIHMS311883-supplement-01.pdf]

**Supplement Figure 1****Psychiatric Symptoms:** Please rate the severity of the patient's current psychiatric symptoms:

|                                         | <b>None</b>              | <b>Mild</b>              | <b>Moderate</b>          | <b>Severe</b>            | <b>Don't Know</b>        |
|-----------------------------------------|--------------------------|--------------------------|--------------------------|--------------------------|--------------------------|
| a. Depressive symptoms                  | <input type="checkbox"/> |
| b. Anxiety symptoms                     | <input type="checkbox"/> |
| c. Psychotic symptoms                   | <input type="checkbox"/> |
| d. Manic symptoms                       | <input type="checkbox"/> |
| e. Alcohol/other substance use symptoms | <input type="checkbox"/> |
| f. Sleeping problems                    | <input type="checkbox"/> |

**Supplement: Table 2**

Association of sleep problems with psychiatric hospitalization in Medicaid psychiatric patients.

| Variable                                | Bivariate <sup>a</sup> |            |          | Multivariate <sup>a</sup> |            |          |
|-----------------------------------------|------------------------|------------|----------|---------------------------|------------|----------|
|                                         | OR                     | 95% CI     | <i>p</i> | AOR                       | 95% CI     | <i>p</i> |
| Severity of sleep problems              |                        |            |          |                           |            |          |
| None                                    | 1.00                   |            | Ref.     | 1.00                      |            | Ref.     |
| Mild                                    | 1.57                   | 1.12- 2.19 | .008     | 1.51                      | 1.04-2.19  | .029     |
| Moderate                                | 2.43                   | 1.78- 3.32 | <.001    | 1.98                      | 1.35-2.90  | <.001    |
| Severe                                  | 2.80                   | 1.91- 4.12 | <.001    | 1.68                      | 1.06-2.68  | .028     |
| Age                                     |                        |            |          |                           |            |          |
| <18                                     | 1.00                   |            | Ref.     | 1.00                      |            | Ref.     |
| 18-35                                   | 2.37                   | 1.74- 3.24 | <.001    | .58                       | .36- .94   | .028     |
| 36-45                                   | 1.78                   | 1.28- 2.46 | <.001    | .42                       | .26- .70   | <.001    |
| >45                                     | 1.25                   | .89- 1.74  | .196     | .34                       | .20- .58   | <.001    |
| Sex                                     |                        |            |          |                           |            |          |
| Female                                  | 1.00                   |            | Ref.     | 1.00                      |            | Ref.     |
| Male                                    | 1.31                   | 1.06- 1.62 | .014     | 1.13                      | .85-1.49   | .398     |
| Race/ethnicity                          |                        |            |          |                           |            |          |
| Non-Hispanic white                      | 1.00                   |            | Ref.     | 1.00                      |            | Ref.     |
| African American                        | 1.63                   | 1.28- 2.08 | <.001    | 1.24                      | .91-1.69   | .169     |
| Hispanic                                | 1.10                   | .78- 1.55  | .596     | 1.12                      | .74-1.70   | .598     |
| Other, mixed, or unknown                | .71                    | .37- 1.37  | .311     | .51                       | .22-1.14   | .102     |
| Diagnosis <sup>b</sup>                  |                        |            |          |                           |            |          |
| Schizophrenia                           | 2.96                   | 2.35- 3.73 | <.001    | .83                       | .33-2.09   | .695     |
| Major depression                        | .66                    | .51- .85   | .002     | .84                       | .34-2.08   | .712     |
| Bipolar disorder                        | 1.37                   | 1.05- 1.78 | .019     | .50                       | .20-1.25   | .136     |
| Anxiety disorder                        | .49                    | .35- .67   | <.001    | .29                       | .10- .78   | .015     |
| Childhood disorder                      | .42                    | .31- .56   | <.001    | .18                       | .07- .47   | <.001    |
| Substance use disorder                  | 2.79                   | 2.07- 3.75 | <.001    | .54                       | .20-1.48   | .230     |
| Other disorder                          | .85                    | .64- 1.12  | .254     | .44                       | .17-1.14   | .093     |
| Psychiatric comorbidity                 |                        |            |          |                           |            |          |
| 1 disorder                              | 1.00                   |            | Ref.     | 1.00                      |            | Ref.     |
| 2 disorders                             | 1.25                   | .99- 1.58  | .058     | 3.09                      | 1.16-8.27  | .024     |
| 3 or more disorders                     | 1.49                   | .99- 2.24  | .058     | 8.31                      | 1.18-58.43 | .033     |
| Moderate to severe symptoms             |                        |            |          |                           |            |          |
| Depressive symptoms                     | 1.47                   | 1.18- 1.82 | .001     | 1.19                      | .86-1.63   | .296     |
| Anxiety symptoms                        | 1.27                   | 1.03- 1.58 | .027     | 1.15                      | .84-1.56   | .379     |
| Psychotic symptoms                      | 5.19                   | 4.09- 6.60 | <.001    | 2.81                      | 1.98-3.99  | <.001    |
| Manic symptoms                          | 3.12                   | 2.32- 4.20 | <.001    | 1.37                      | .91-2.08   | .136     |
| Alcohol or other substance use symptoms | 4.56                   | 3.45- 6.01 | <.001    | 2.39                      | 1.62-3.53  | <.001    |

|                                                |      |            |       |      |           |       |
|------------------------------------------------|------|------------|-------|------|-----------|-------|
| General medical conditions                     |      |            |       |      |           |       |
| None                                           | 1.00 |            | Ref.  | 1.00 |           | Ref.  |
| 1 condition                                    | 1.31 | .97- 1.77  | .079  | 1.33 | .93-1.91  | .119  |
| 2 or more conditions                           | 1.16 | .83- 1.62  | .391  | 1.00 | .66-1.51  | .988  |
| Psychiatric medication prescribed <sup>c</sup> |      |            |       |      |           |       |
| Antidepressants                                | .60  | .48- .74   | <.001 | .85  | .62-1.16  | .301  |
| Antipsychotics                                 | 3.63 | 2.87- 4.61 | <.001 | 1.80 | 1.29-2.50 | <.001 |
| Benzodiazepines                                | .72  | .55- .94   | .016  | .76  | .54-1.08  | .130  |
| Mood stabilizers                               | 2.17 | 1.71- 2.74 | <.001 | 1.95 | 1.40-2.70 | <.001 |
| Non-benzodiazepine hypnotics                   | .74  | .43- 1.26  | .268  | .92  | .51-1.64  | .772  |

<sup>a</sup> Results from binary logistic regression analyses. OR stands for odds ratio, AOR for adjusted odds ratio and CI for confidence interval. Analyses were weighted by the clinician's Medicaid caseload, as well as the number of psychiatrists treating Medicaid patients in each state.

<sup>b</sup> Patients with each diagnosis were compared with all other patients not carrying that diagnosis. For example, patients with a diagnosis of schizophrenia were compared with all patients without a diagnosis of schizophrenia.

<sup>c</sup> Patients prescribed each type of medication were compared to all other patients not prescribed that type of medication.

**Supplement: Table 3**

Association of sleep problems with emergency department visits in Medicaid psychiatric patients.

| Variable                                | Bivariate <sup>a</sup> |            |          | Multivariate <sup>a</sup> |            |          |
|-----------------------------------------|------------------------|------------|----------|---------------------------|------------|----------|
|                                         | OR                     | 95% CI     | <i>p</i> | AOR                       | 95% CI     | <i>p</i> |
| Severity of sleep problems              |                        |            |          |                           |            |          |
| None                                    | 1.00                   |            | Ref.     | 1.00                      |            | Ref.     |
| Mild                                    | 1.42                   | 1.03- 1.95 | .033     | 1.29                      | .91- 1.83  | .148     |
| Moderate                                | 2.43                   | 1.80- 3.28 | <.001    | 1.79                      | 1.26- 2.55 | .001     |
| Severe                                  | 3.77                   | 2.59- 5.47 | <.001    | 2.37                      | 1.52- 3.70 | <.001    |
| Age                                     |                        |            |          |                           |            |          |
| <18                                     | 1.00                   |            | Ref.     | 1.00                      |            | Ref.     |
| 18-35                                   | 2.70                   | 1.98- 3.67 | <.001    | .89                       | .57- 1.39  | .604     |
| 36-45                                   | 2.24                   | 1.63- 3.09 | <.001    | .74                       | .46- 1.19  | .217     |
| >45                                     | 1.47                   | 1.07- 2.04 | .019     | .51                       | .31- .85   | .010     |
| Sex                                     |                        |            |          |                           |            |          |
| Female                                  | 1.00                   |            | Ref.     | 1.00                      |            | Ref.     |
| Male                                    | 1.07                   | .87- 1.32  | .510     | .98                       | .76- 1.26  | .871     |
| Race/ethnicity                          |                        |            |          |                           |            |          |
| Non-Hispanic white                      | 1.00                   |            | Ref.     | 1.00                      |            | Ref.     |
| African American                        | 1.35                   | 1.06- 1.71 | .015     | 1.12                      | .84- 1.50  | .434     |
| Hispanic                                | 1.09                   | .78- 1.52  | .597     | 1.08                      | .73- 1.59  | .708     |
| Other, mixed, or unknown                | .75                    | .40- 1.37  | .347     | .58                       | .27- 1.26  | .170     |
| Diagnosis <sup>b</sup>                  |                        |            |          |                           |            |          |
| Schizophrenia                           | 2.18                   | 1.74- 2.74 | <.001    | .60                       | .25- 1.43  | .249     |
| Major depression                        | .88                    | .69- 1.12  | .302     | .74                       | .32- 1.72  | .487     |
| Bipolar disorder                        | 1.21                   | .93- 1.56  | .153     | .39                       | .16- .94   | .036     |
| Anxiety disorder                        | .69                    | .52- .91   | .010     | .39                       | .15- 1.00  | .051     |
| Childhood disorder                      | .40                    | .30- .52   | <.001    | .23                       | .09- .58   | .002     |
| Substance use disorder                  | 2.89                   | 2.15- 3.90 | <.001    | .66                       | .26- 1.70  | .391     |
| Other disorder                          | .87                    | .66- 1.13  | .293     | .41                       | .17- .99   | .046     |
| Psychiatric comorbidity                 |                        |            |          |                           |            |          |
| 1 disorder                              | 1.00                   |            | Ref.     | 1.00                      |            | Ref.     |
| 2 disorders                             | 1.31                   | 1.04- 1.63 | .020     | 2.70                      | 1.08- 6.76 | .034     |
| 3 or more disorders                     | 1.38                   | .92- 2.07  | .116     | 5.49                      | .89- 33.66 | .066     |
| Moderate to severe symptoms             |                        |            |          |                           |            |          |
| Depressive symptoms                     | 1.63                   | 1.32- 2.01 | <.001    | 1.06                      | .78- 1.43  | .728     |
| Anxiety symptoms                        | 1.65                   | 1.34- 2.03 | <.001    | 1.41                      | 1.05- 1.89 | .021     |
| Psychotic symptoms                      | 3.64                   | 2.89- 4.60 | <.001    | 2.01                      | 1.44- 2.81 | <.001    |
| Manic symptoms                          | 2.46                   | 1.83- 3.31 | <.001    | 1.24                      | .83- 1.85  | .286     |
| Alcohol or other substance use symptoms | 4.65                   | 3.51- 6.17 | <.001    | 2.33                      | 1.59- 3.42 | <.001    |

|                                                |      |            |       |      |            |       |
|------------------------------------------------|------|------------|-------|------|------------|-------|
| General medical conditions                     |      |            |       |      |            |       |
| None                                           | 1.00 |            | Ref.  | 1.00 |            | Ref.  |
| 1 condition                                    | 1.03 | .78- 1.38  | .825  | .95  | .69- 1.32  | .770  |
| 2 or more conditions                           | 1.16 | .84- 1.59  | .370  | .93  | .64- 1.35  | .710  |
| Psychiatric medication prescribed <sup>c</sup> |      |            |       |      |            |       |
| Antidepressants                                | .76  | .62- .94   | .010  | .85  | .64- 1.14  | .280  |
| Antipsychotics                                 | 2.71 | 2.17- 3.37 | <.001 | 1.75 | 1.29- 2.38 | <.001 |
| Benzodiazepines                                | .86  | .67- 1.11  | .250  | .76  | .55- 1.05  | .102  |
| Mood stabilizers                               | 1.73 | 1.37- 2.18 | <.001 | 1.51 | 1.11- 2.06 | .009  |
| Non-benzodiazepine hypnotics                   | .65  | .38- 1.10  | .106  | .64  | .37- 1.13  | .124  |

<sup>a</sup> Results from binary logistic regression analyses. OR stands for odds ratio, AOR for adjusted odds ratio and CI for confidence interval. Analyses were weighted by the clinician's Medicaid caseload, as well as the number of psychiatrists treating Medicaid patients in each state.

<sup>b</sup> Patients with each diagnosis were compared with all other patients not carrying that diagnosis. For example, patients with a diagnosis of schizophrenia were compared with all patients without a diagnosis of schizophrenia.

<sup>c</sup> Patients prescribed each type of medication were compared to all other patients not prescribed that type of medication.
